# Supplementary material for: Elevated mRNA Levels of AURKA, CDC20 and TPX2 are associated with poor prognosis of smoking related lung adenocarcinoma using bioinformatics analysis
Source: PubMed Central journal article supplement — Int J Med Sci. 2018 Nov 5;15(14):1676–85. doi: 10.7150/ijms.28728 (PMC6299412; doi:10.7150/ijms.28728), 2018-11-05
Supplement: ijmsv15p1676s1.pdf [file ijmsv15p1676s1.pdf]

## Supplementary files

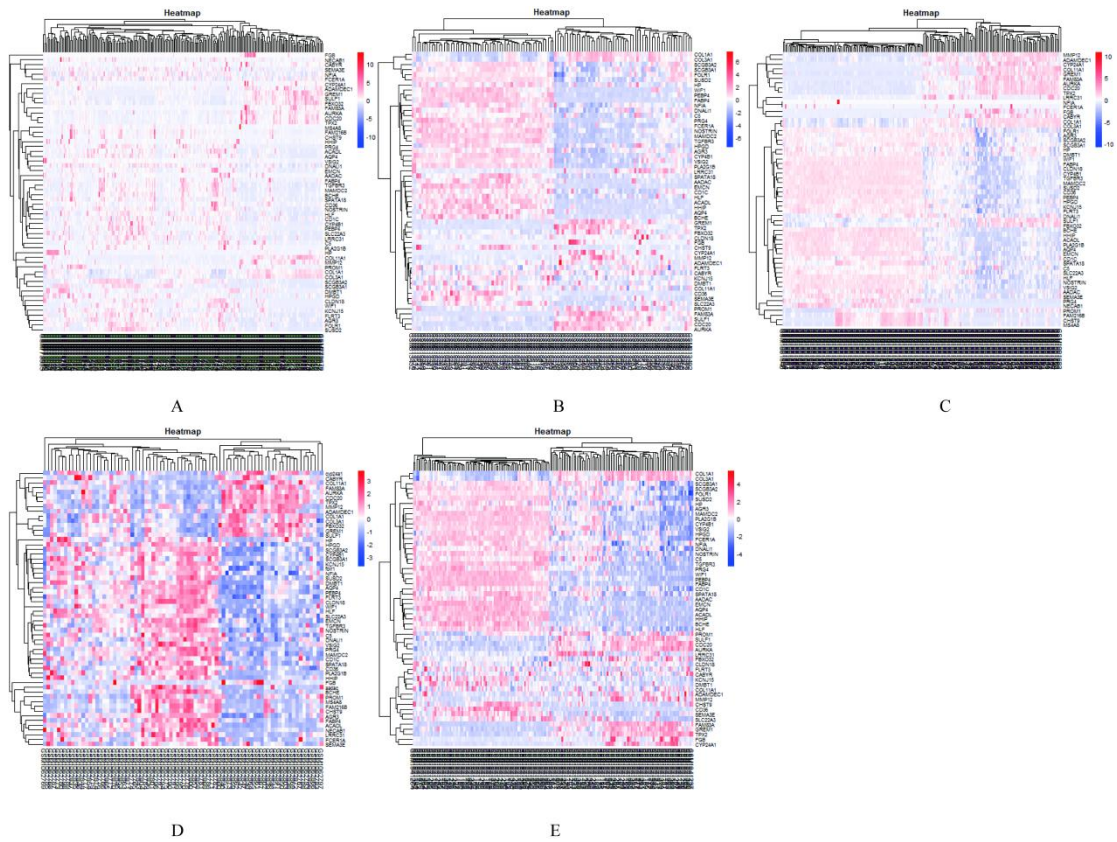

**Supplementary Figure S1. Two-dimensional hierarchical clustering of the significant and 58 DEGs in all samples.** Genes are in rows; samples are in columns. Both up-regulated and down-regulated mRNAs can be seen in tumors compared with normal tissues in 3 lung adenocarcinoma datasets(B, C, E); Both up-regulated and down-regulated mRNAs can be seen in smokers and non-smokers in 2 smoking related lung adenocarcinoma datasets(A, D). **A:** GSE31210. **B:** GSE32863. **C:** GSE40791. **D:** GSE43458. **E:** GSE75037.

**Supplementary Table S1. 58 DEGs in smoking related lung adenocarcinoma.**

| <b>Gene symbol</b> | <b>Gene name</b>                                                     |
|--------------------|----------------------------------------------------------------------|
| AADAC              | arylacetamide deacetylase                                            |
| ACADL              | acyl-CoA dehydrogenase, long chain                                   |
| ADAMDEC1           | ADAM like decysin 1                                                  |
| AGR3               | anterior gradient 3                                                  |
| AQP4               | aquaporin 4                                                          |
| AURKA              | aurora kinase A                                                      |
| BCHE               | butyrylcholinesterase                                                |
| C5                 | complement component 5                                               |
| CABYR              | calcium binding tyrosine phosphorylation regulated                   |
| CD1C               | CD1c molecule                                                        |
| CD36               | CD36 molecule (thrombospondin receptor)                              |
| CDC20              | cell division cycle 20                                               |
| CHST9              | carbohydrate sulfotransferase 9                                      |
| CLDN18             | claudin 18                                                           |
| COL11A1            | collagen type XI alpha 1 chain                                       |
| COL1A1             | collagen type I alpha 1 chain                                        |
| COL3A1             | collagen type III alpha 1 chain                                      |
| CYP24A1            | cytochrome P450, family 24, subfamily A, polypeptide 1               |
| CYP4B1             | cytochrome P450, family 4, subfamily B, polypeptide 1                |
| DMBT1              | deleted in malignant brain tumors 1                                  |
| DNALI1             | dynein axonemal light intermediate chain 1                           |
| EMCN               | endomucin                                                            |
| FABP4              | fatty acid binding protein 4, adipocyte                              |
| FAM216B            | family with sequence similarity 216, member B                        |
| FAM83A             | family with sequence similarity 83, member A                         |
| FBXO32             | F-box protein 32                                                     |
| FCER1A             | Fc fragment of IgE, high affinity I, receptor for; alpha polypeptide |
| FGB                | fibrinogen beta chain                                                |
| FLRT3              | fibronectin leucine rich transmembrane protein 3                     |
| FOLR1              | folate receptor 1                                                    |
| GREM1              | gremlin 1                                                            |
| HHIP               | hedgehog interacting protein                                         |
| HLF                | hepatic leukemia factor                                              |
| HP                 | haptoglobin                                                          |
| HPGD               | hematopoietic prostaglandin D synthase                               |

|         |                                                                                        |
|---------|----------------------------------------------------------------------------------------|
| KCNJ15  | potassium inwardly-rectifying channel, subfamily J, member 15                          |
| LRRC31  | leucine rich repeat containing 31                                                      |
| MAMDC2  | MAM domain containing 2                                                                |
| MMP12   | matrix metalloproteinase 12                                                            |
| MS4A8   | membrane-spanning 4-domains, subfamily A, member 8                                     |
| NECAB1  | N-terminal EF-hand calcium binding protein 1                                           |
| NFIA    | nuclear factor I/A                                                                     |
| NOSTRIN | nitric oxide synthase trafficking                                                      |
| PEBP4   | phosphatidylethanolamine-binding protein 4                                             |
| PLA2G1B | phospholipase A2, group IB (pancreas)                                                  |
| PRG4    | proteoglycan 4                                                                         |
| PROM1   | prominin 1                                                                             |
| SCGB3A1 | secretoglobin, family 3A, member 1                                                     |
| SCGB3A2 | secretoglobin, family 3A, member 2                                                     |
| SEMA3E  | sema domain, immunoglobulin domain (Ig), short basic domain, secreted, (semaphorin) 3E |
| SLC22A3 | solute carrier family 22 (organic cation transporter), member 3                        |
| SPATA18 | spermatogenesis associated 18                                                          |
| SULF1   | sulfatase 1                                                                            |
| SUSD2   | sushi domain containing 2                                                              |
| TGFBR3  | transforming growth factor beta                                                        |
| TPX2    | TPX2, microtubule-associated                                                           |
| VSIG2   | V-set and immunoglobulin domain containing 2                                           |
| WIF1    | WNT inhibitory factor 1                                                                |

---

**Supplementary Table S2. Gene Ontology enrichment of 58 DEGs in smoking related lung adenocarcinoma.**

| <b>Ontology</b>    | <b>Term</b>                                            | <b>P Value</b> | <b>Fold_Enrichment</b> |
|--------------------|--------------------------------------------------------|----------------|------------------------|
| Cellular component | GO:0005576~extracellular region                        | 5.87E-07       | 3.840461402            |
| Biological process | GO:0006898~receptor-mediated endocytosis               | 1.81E-05       | 12.39131351            |
| Cellular component | GO:0009986~cell surface                                | 3.20E-05       | 6.004217185            |
| Cellular component | GO:0005615~extracellular space                         | 3.33E-05       | 3.623926185            |
| Biological process | GO:0030199~collagen fibril organization                | 2.11E-04       | 33.76973353            |
| Cellular component | GO:0009897~external side of plasma membrane            | 4.50E-04       | 9.167002012            |
| Biological process | GO:0030574~collagen catabolic process                  | 9.11E-04       | 20.57843137            |
| Cellular component | GO:0005581~collagen trimer                             | 0.002701753    | 14.14906832            |
| Cellular component | GO:0005887~integral component of plasma membrane       | 0.002956991    | 2.759818274            |
| Cellular component | GO:0005578~proteinaceous extracellular matrix          | 0.008668498    | 6.071428571            |
| Molecular function | GO:0005044~scavenger receptor activity                 | 0.009237451    | 20.28966346            |
| Biological process | GO:0043152~induction of bacterial agglutination        | 0.011858397    | 164.627451             |
| Molecular function | GO:0005201~extracellular matrix structural constituent | 0.017459197    | 14.5358783             |
| Molecular function | GO:0003824~catalytic activity                          | 0.019143607    | 6.907119476            |
| Cellular component | GO:0005788~endoplasmic reticulum lumen                 | 0.020229039    | 6.779761905            |
| Biological process | GO:0030198~extracellular matrix organization           | 0.020540948    | 6.719487795            |

|                    |                                                                              |                 |             |
|--------------------|------------------------------------------------------------------------------|-----------------|-------------|
| Cellular component | GO:0043203~axon hillock                                                      | 0.02093908<br>8 | 92.97959184 |
| Molecular function | GO:0030674~protein binding, bridging                                         | 0.02266811      | 12.6481019  |
| Biological process | GO:0040036~regulation of fibroblast growth factor receptor signaling pathway | 0.02357895<br>2 | 82.31372549 |
| Biological process | GO:0007179~transforming growth factor beta receptor signaling pathway        | 0.03068162<br>2 | 10.73657289 |
| Molecular function | GO:0048407~platelet-derived growth factor binding                            | 0.03274470<br>1 | 59.02447552 |
| Biological process | GO:0006955~immune response                                                   | 0.03628767<br>5 | 3.91039076  |
| Molecular function | GO:0030247~polysaccharide binding                                            | 0.04149110<br>6 | 46.37637363 |
| Biological process | GO:0002063~chondrocyte development                                           | 0.04376295<br>3 | 43.90065359 |
| Biological process | GO:0030168~platelet activation                                               | 0.04602387      | 8.589258312 |
| Cellular component | GO:0071682~endocytic vesicle lumen                                           | 0.04722922<br>1 | 40.67857143 |
| Molecular function | GO:0050431~transforming growth factor beta binding                           | 0.04727891<br>5 | 40.57932692 |

---

**Supplementary Table S3. KEGG pathway of 58 DEGs in smoking related lung adenocarcinoma.**

| <b>Term</b>                      | <b>P Value</b> | <b>Fold Enrichment</b> |
|----------------------------------|----------------|------------------------|
| ECM-receptor interaction         | 0.004065856    | 11.76670924            |
| Platelet activation              | 0.012332612    | 7.874643875            |
| PPAR signaling pathway           | 0.025914484    | 11.45936982            |
| Protein digestion and absorption | 0.042764316    | 8.724747475            |
